# Supplementary material for: A high-pressure resistant ternary network hydrogel based flexible strain sensor with a uniaxially oriented porous structure toward gait detection
Source: Royal Society of Chemistry journal article supplement (doi:10.1039/d2sm01286c), 2022-01-01
Supplement: d2sm01286c5.pdf [file d2sm01286c5.pdf]

## Supporting Information

### **A High-pressure Resistant Ternary Network Hydrogel based Flexible Strain Sensor with Uniaxially Oriented Porous Structure towards Gait Detection**

Xin Dong,<sup>a</sup> Yaqing Ge,<sup>b</sup> Keyi Li,<sup>c</sup> Xinyi Li,<sup>b</sup> Yong Liu,<sup>b</sup> Dongyu Xu,<sup>d\*</sup> Shoude Wang<sup>a\*</sup> and Xiangling Gu<sup>b\*</sup>

a. Shandong Provincial Key Laboratory of Preparation and Measurement of Building Materials, University of Jinan.

b. College of Medicine and Nursing, Shandong Provincial Engineering Laboratory of Novel Pharmaceutical Excipients, Sustained and Controlled Release Preparations, Dezhou University.

c. College of Chemistry and Chemical Engineering, Shandong University of Technology

d. College of Civil Engineering and Architecture, Linyi University.

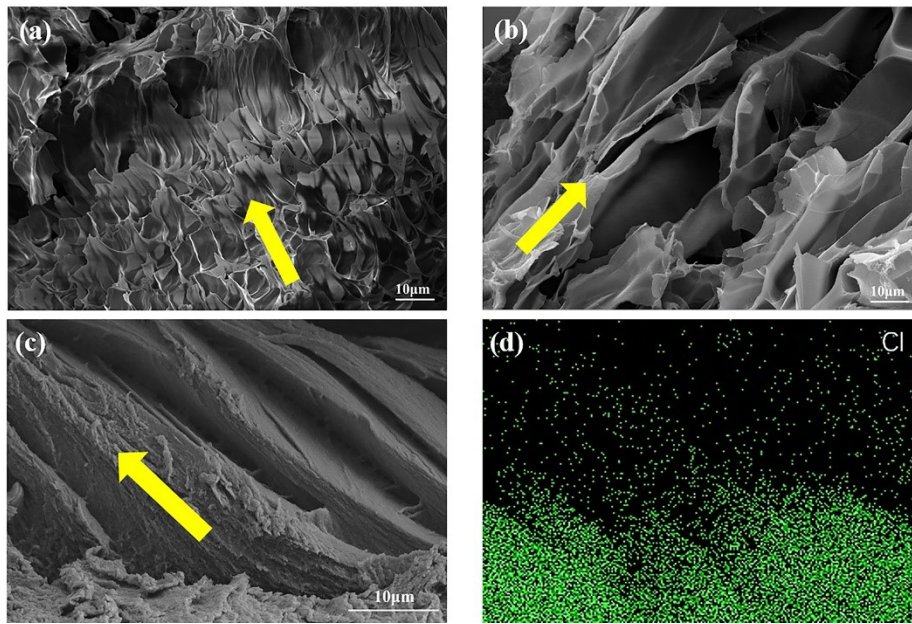

**Fig. S1.** Micromorphology of hydrogel: SEM of PVA-PAA hydrogel with freeze-thaw method (a); SEM of PANI@PVA-PAA hydrogel (b); SEM of PANI@(PVA-PAA) hydrogel (c); Elemental mapping images of Cl analyzed by EDS (d).

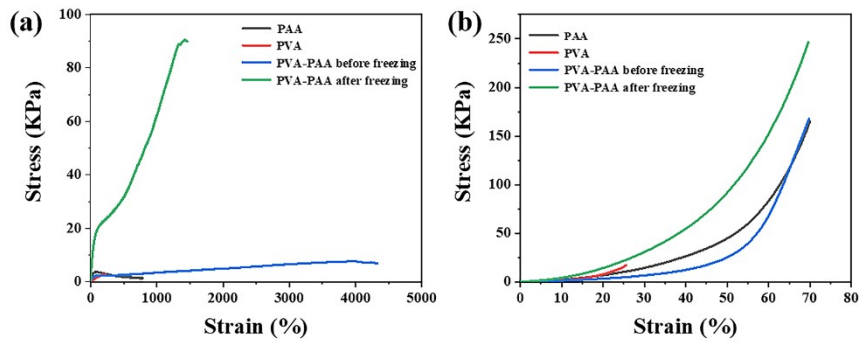

**Fig. S2.** Mechanical properties of four types of hydrogels: PAA hydrogel, PVA hydrogel and PVA-PAA hydrogel without or with freeze-thaw treatment. Tensile stress-strain curve (a); Compressive stress-strain curve (b).

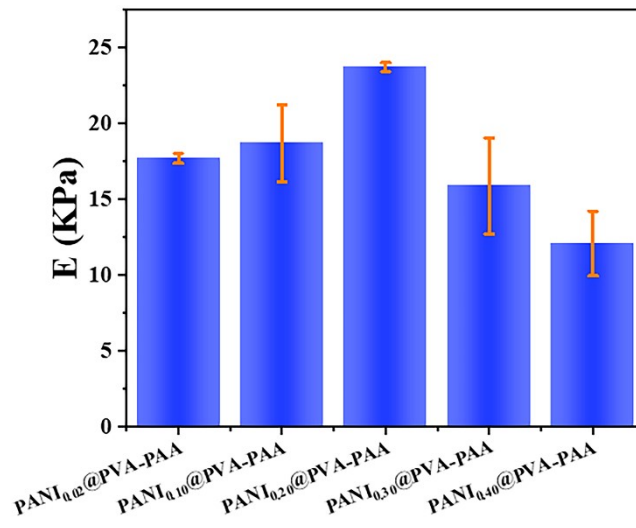

Fig. S3. Average modulus of hydrogels at different aniline concentrations.
