# Supplementary figures and images for: A high-pressure resistant ternary network hydrogel based flexible strain sensor with a uniaxially oriented porous structure toward gait detection
Source: Royal Society of Chemistry journal article supplement (doi:10.1039/d2sm01286c), 2022-01-01

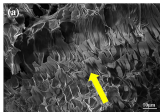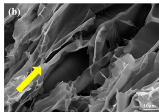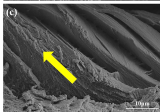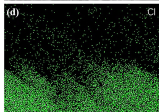

Supplement: d2sm01286c2.pdf [file d2sm01286c2.pdf]

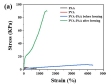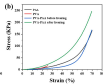

Supplement: d2sm01286c3.pdf [file d2sm01286c3.pdf]

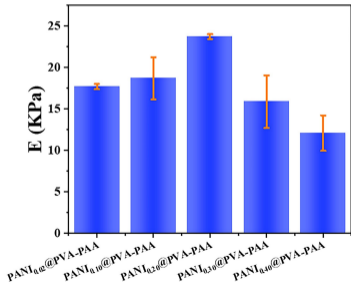

Supplement: d2sm01286c4.pdf [file d2sm01286c4.pdf]
